# Supplementary material
Source: MDPI journal article supplement (https://www.mdpi.com/2311-7524/10/2/187)
Supplement: s1 [file s1]

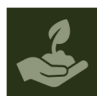**Table S1.** Influence of the main variables and their interaction on polyphenolic profile of raspberry fruits.

| Variables           |                  | CA                      | pCOU                     | FA                      | EA                         |
|---------------------|------------------|-------------------------|--------------------------|-------------------------|----------------------------|
| A<br>(viral status) | 1 (infected)     | 7.9 ± 2.7               | 9.2 ± 8.7 <sup>a</sup>   | 8.1 ± 2.7 <sup>b</sup>  | 251.7 ± 121.6 <sup>a</sup> |
|                     | 2 (negative)     | 7.6 ± 2.8               | 5.3 ± 2.8 <sup>b</sup>   | 8.8 ± 4.5 <sup>a</sup>  | 229.6 ± 127.1 <sup>b</sup> |
| B<br>(harvest year) | 1 (2019)         | 9.6 ± 2.3 <sup>a</sup>  | 6.7 ± 3.6 <sup>b</sup>   | 10.6 ± 4.1 <sup>a</sup> | 161.6 ± 46.6 <sup>b</sup>  |
|                     | 2 (2020)         | 5.9 ± 1.6 <sup>b</sup>  | 7.8 ± 8.8 <sup>a</sup>   | 6.3 ± 1.2 <sup>b</sup>  | 319.7 ± 125.7 <sup>a</sup> |
| C<br>(locality)     | 1 (Bedina Varoš) | 5.9 ± 2.3 <sup>c</sup>  | 10.0 ± 10.2 <sup>a</sup> | 7.6 ± 2.4 <sup>b</sup>  | 172.0 ± 37.9 <sup>c</sup>  |
|                     | 2 (Devići)       | 7.5 ± 2.2 <sup>b</sup>  | 5.4 ± 1.3 <sup>c</sup>   | 8.8 ± 3.0 <sup>a</sup>  | 210.7 ± 105.4 <sup>b</sup> |
|                     | 3 (Cerova)       | 9.8 ± 2.1 <sup>a</sup>  | 6.3 ± 4.8 <sup>b</sup>   | 8.9 ± 5.2 <sup>a</sup>  | 339.3 ± 137.6 <sup>a</sup> |
| A × B               | 1 × 1            | 9.9 ± 1.8               | 7.7 ± 3.9 <sup>b</sup>   | 9.5 ± 3.1 <sup>b</sup>  | 182.2 ± 42.0 <sup>b</sup>  |
|                     | 1 × 2            | 5.8 ± 1.7               | 10.7 ± 11.8 <sup>a</sup> | 6.7 ± 1.4 <sup>c</sup>  | 321.2 ± 137.1 <sup>a</sup> |
|                     | 1 × 3            | 9.3 ± 2.8               | 5.7 ± 3.3 <sup>c</sup>   | 11.7 ± 4.8 <sup>a</sup> | 141.1 ± 43.6 <sup>c</sup>  |
|                     | 1 × 4            | 5.9 ± 1.6               | 4.8 ± 2.5 <sup>c</sup>   | 5.9 ± 0.9 <sup>c</sup>  | 318.2 ± 121.6 <sup>a</sup> |
| A × C               | 1 × 1            | 6.5 ± 3.2 <sup>bc</sup> | 15.2 ± 12.3 <sup>a</sup> | 9.5 ± 1.7 <sup>b</sup>  | 203.5 ± 13.0 <sup>d</sup>  |
|                     | 1 × 2            | 7.3 ± 1.6 <sup>b</sup>  | 5.2 ± 1.3 <sup>c</sup>   | 9.0 ± 3.4 <sup>b</sup>  | 189.2 ± 65.1 <sup>d</sup>  |
|                     | 1 × 3            | 9.8 ± 2.3 <sup>a</sup>  | 7.2 ± 6.0 <sup>b</sup>   | 5.7 ± 0.6 <sup>c</sup>  | 362.4 ± 153.9 <sup>a</sup> |
|                     | 2 × 1            | 5.2 ± 1.0 <sup>c</sup>  | 4.8 ± 3.4 <sup>c</sup>   | 5.7 ± 1.1 <sup>c</sup>  | 140.5 ± 24.7 <sup>e</sup>  |
|                     | 2 × 2            | 7.7 ± 2.8 <sup>b</sup>  | 5.6 ± 1.4 <sup>c</sup>   | 8.6 ± 2.8 <sup>b</sup>  | 232.3 ± 138.1 <sup>c</sup> |
|                     | 2 × 3            | 9.9 ± 2.2 <sup>a</sup>  | 5.5 ± 3.6 <sup>c</sup>   | 12.0 ± 6.0 <sup>a</sup> | 316.2 ± 129.2 <sup>b</sup> |
| B × C               | 1 × 1            | 7.5 ± 2.2               | 2.9 ± 1.5 <sup>de</sup>  | 8.6 ± 2.6 <sup>b</sup>  | 156.4 ± 42.1 <sup>e</sup>  |
|                     | 1 × 2            | 9.4 ± 1.1               | 6.6 ± 0.4 <sup>c</sup>   | 11.6 ± 0.8 <sup>a</sup> | 118.2 ± 13.8 <sup>f</sup>  |
|                     | 1 × 3            | 11.9 ± 0.5              | 10.6 ± 2.6 <sup>b</sup>  | 11.6 ± 6.5 <sup>a</sup> | 210.3 ± 16.9 <sup>c</sup>  |
|                     | 2 × 1            | 4.2 ± 0.6               | 17.1 ± 10.2 <sup>a</sup> | 6.6 ± 2.0 <sup>c</sup>  | 187.6 ± 28.5 <sup>d</sup>  |
|                     | 2 × 2            | 5.6 ± 0.8               | 4.2 ± 0.2 <sup>d</sup>   | 6.0 ± 0.3 <sup>c</sup>  | 303.3 ± 60.8 <sup>b</sup>  |
|                     | 2 × 3            | 7.8 ± 0.2               | 2.1 ± 0.3 <sup>e</sup>   | 6.2 ± 0.8 <sup>c</sup>  | 468.2 ± 38.3 <sup>a</sup>  |

Table S1 continued

| Variables           |                  | RUT                       | ISO-Q                    | Q3-RHA                    | Q                        |
|---------------------|------------------|---------------------------|--------------------------|---------------------------|--------------------------|
| A<br>(viral status) | 1 (infected)     | 109.2 ± 35.8 <sup>a</sup> | 51.5 ± 12.9 <sup>a</sup> | 55.5 ± 20.7               | 13.3 ± 15.2              |
|                     | 2 (negative)     | 73.0 ± 21.2 <sup>b</sup>  | 39.2 ± 19.6 <sup>b</sup> | 55.9 ± 19.1               | 13.4 ± 15.8              |
| B<br>(harvest year) | 1 (2019)         | 99.2 ± 28.8 <sup>a</sup>  | 34.5 ± 10.4 <sup>b</sup> | 55.3 ± 13.5 <sup>b</sup>  | 7.6 ± 2.6 <sup>b</sup>   |
|                     | 2 (2020)         | 83.0 ± 38.2 <sup>b</sup>  | 56.2 ± 16.4 <sup>a</sup> | 57.1 ± 24.7 <sup>a</sup>  | 19.1 ± 20.1 <sup>a</sup> |
| C<br>(locality)     | 1 (Bedina Varoš) | 103.7 ± 48.0 <sup>a</sup> | 44.0 ± 11.1 <sup>b</sup> | 72.7 ± 9.2 <sup>a</sup>   | 27.9 ± 19.7 <sup>a</sup> |
|                     | 2 (Devići)       | 65.8 ± 7.8 <sup>b</sup>   | 49.8 ± 19.5 <sup>a</sup> | 38.8 ± 13.0 <sup>c</sup>  | 6.6 ± 2.3 <sup>b</sup>   |
|                     | 3 (Cerova)       | 103.8 ± 18.6 <sup>a</sup> | 42.2 ± 20.8 <sup>b</sup> | 57.2 ± 18.5 <sup>b</sup>  | 5.6 ± 0.6 <sup>c</sup>   |
| A × B               | 1 × 1            | 113.8 ± 33.6 <sup>a</sup> | 41.5 ± 7.1 <sup>c</sup>  | 53.8 ± 10.8 <sup>c</sup>  | 7.7 ± 2.0                |
|                     | 1 × 2            | 104.6 ± 39.4 <sup>b</sup> | 61.5 ± 8.7 <sup>a</sup>  | 59.2 ± 27.9 <sup>a</sup>  | 18.8 ± 20.4              |
|                     | 1 × 3            | 84.6 ± 12.3 <sup>c</sup>  | 27.4 ± 8.3 <sup>d</sup>  | 56.8 ± 16.4 <sup>b</sup>  | 7.5 ± 3.2                |
|                     | 1 × 4            | 61.4 ± 22.4 <sup>d</sup>  | 51.0 ± 20.8 <sup>b</sup> | 55.0 ± 22.6 <sup>bc</sup> | 19.3 ± 21.0              |
| A × C               | 1 × 1            | 144.3 ± 5.6 <sup>a</sup>  | 54.1 ± 4.4 <sup>a</sup>  | 73.0 ± 10.8 <sup>a</sup>  | 26.3 ± 21.6 <sup>b</sup> |
|                     | 1 × 2            | 63.0 ± 9.7 <sup>d</sup>   | 45.7 ± 9.6 <sup>b</sup>  | 31.2 ± 9.4 <sup>e</sup>   | 7.9 ± 2.7 <sup>c</sup>   |
|                     | 1 × 3            | 120.4 ± 7.3 <sup>b</sup>  | 54.6 ± 19.8 <sup>a</sup> | 65.3 ± 7.7 <sup>b</sup>   | 5.6 ± 0.7 <sup>d</sup>   |
|                     | 2 × 1            | 63.2 ± 32.8 <sup>d</sup>  | 34.0 ± 2.6 <sup>c</sup>  | 72.4 ± 8.2 <sup>a</sup>   | 29.5 ± 19.6 <sup>a</sup> |
|                     | 2 × 2            | 68.6 ± 4.5 <sup>d</sup>   | 53.8 ± 26.6 <sup>a</sup> | 46.3 ± 12.1 <sup>d</sup>  | 5.3 ± 0.4 <sup>d</sup>   |
|                     | 2 × 3            | 87.3 ± 7.1 <sup>c</sup>   | 29.8 ± 14.0 <sup>d</sup> | 49.1 ± 23.2 <sup>c</sup>  | 5.6 ± 0.4 <sup>d</sup>   |
| B × C               | 1 × 1            | 119.4 ± 29.5 <sup>a</sup> | 43.2 ± 8.6 <sup>c</sup>  | 64.1 ± 1.3 <sup>b</sup>   | 9.1 ± 2.9 <sup>b</sup>   |
|                     | 1 × 2            | 70.4 ± 3.3 <sup>d</sup>   | 33.3 ± 4.3 <sup>d</sup>  | 37.5 ± 3.1 <sup>d</sup>   | 7.8 ± 2.8 <sup>b</sup>   |
|                     | 1 × 3            | 107.9 ± 19.0 <sup>b</sup> | 26.9 ± 10.7 <sup>e</sup> | 64.3 ± 6.6 <sup>b</sup>   | 6.0 ± 0.4 <sup>c</sup>   |
|                     | 2 × 1            | 88.1 ± 60.0 <sup>c</sup>  | 45.0 ± 13.9 <sup>c</sup> | 81.3 ± 2.2 <sup>a</sup>   | 46.7 ± 1.5 <sup>a</sup>  |
|                     | 2 × 2            | 61.2 ± 8.4 <sup>d</sup>   | 66.2 ± 13.2 <sup>a</sup> | 39.9 ± 19.0 <sup>d</sup>  | 5.4 ± 0.4 <sup>c</sup>   |
|                     | 2 × 3            | 99.8 ± 19.0 <sup>b</sup>  | 57.6 ± 16.6 <sup>b</sup> | 50.1 ± 24.3 <sup>c</sup>  | 5.2 ± 0.3 <sup>c</sup>   |

Table S1 continued

| Variables           |                  | KAE                     | CY3-GLU                   | CY3-SOP                    | PHENOL                     |
|---------------------|------------------|-------------------------|---------------------------|----------------------------|----------------------------|
| A<br>(viral status) | 1 (infected)     | 10.6 ± 4.8 <sup>a</sup> | 62.0 ± 45.3 <sup>a</sup>  | 284.8 ± 207.7 <sup>a</sup> | 289.4 ± 32.4               |
|                     | 2 (negative)     | 9.7 ± 4.3 <sup>b</sup>  | 57.3 ± 28.0 <sup>b</sup>  | 246.7 ± 114.6 <sup>b</sup> | 289.3 ± 33.6               |
| B<br>(harvest year) | 1 (2019)         | 12.9 ± 3.5 <sup>a</sup> | 88.3 ± 30.2 <sup>a</sup>  | 400.9 ± 130.6 <sup>a</sup> | 309.1 ± 29.0 <sup>a</sup>  |
|                     | 2 (2020)         | 7.4 ± 3.7 <sup>b</sup>  | 31.0 ± 14.2 <sup>b</sup>  | 130.6 ± 36.9 <sup>b</sup>  | 269.6 ± 22.5 <sup>b</sup>  |
| C<br>(locality)     | 1 (Bedina Varoš) | 14.6 ± 2.8 <sup>a</sup> | 68.6 ± 44.3 <sup>a</sup>  | 284.9 ± 196.5 <sup>b</sup> | 279.5 ± 18.3 <sup>b</sup>  |
|                     | 2 (Devići)       | 9.4 ± 3.2 <sup>b</sup>  | 39.2 ± 19.2 <sup>b</sup>  | 188.5 ± 91.2 <sup>c</sup>  | 290.9 ± 42.5 <sup>b</sup>  |
|                     | 3 (Cerova)       | 6.4 ± 3.0 <sup>c</sup>  | 71.2 ± 37.2 <sup>a</sup>  | 313.8 ± 177.1 <sup>a</sup> | 307.7 ± 25.9 <sup>a</sup>  |
| A × B               | 1 × 1            | 13.6 ± 3.7              | 100.3 ± 31.2 <sup>a</sup> | 467.4 ± 128.4 <sup>a</sup> | 304.4 ± 36.0 <sup>b</sup>  |
|                     | 1 × 2            | 7.7 ± 3.9               | 23.6 ± 9.0 <sup>d</sup>   | 102.2 ± 17.1 <sup>d</sup>  | 274.3 ± 20.6 <sup>c</sup>  |
|                     | 1 × 3            | 12.2 ± 3.4              | 76.3 ± 25.2 <sup>b</sup>  | 334.4 ± 99.1 <sup>b</sup>  | 313.8 ± 21.1 <sup>a</sup>  |
|                     | 1 × 4            | 7.2 ± 3.7               | 38.4 ± 15.0 <sup>c</sup>  | 159.0 ± 28.1 <sup>c</sup>  | 264.8 ± 24.5 <sup>d</sup>  |
| A × C               | 1 × 1            | 15.3 ± 3.3              | 74.0 ± 64.7 <sup>a</sup>  | 344.8 ± 273.5 <sup>a</sup> | 263.7 ± 6.1 <sup>c</sup>   |
|                     | 1 × 2            | 9.8 ± 3.2               | 41.5 ± 23.1 <sup>c</sup>  | 196.0 ± 119.1 <sup>d</sup> | 296.5 ± 46.6 <sup>ab</sup> |
|                     | 1 × 3            | 6.9 ± 3.6               | 70.5 ± 38.9 <sup>ab</sup> | 313.5 ± 207.7 <sup>b</sup> | 307.9 ± 9.6 <sup>a</sup>   |
|                     | 2 × 1            | 14.0 ± 2.4              | 63.2 ± 8.8 <sup>b</sup>   | 245.1 ± 64.8 <sup>c</sup>  | 295.2 ± 10.2 <sup>b</sup>  |
|                     | 2 × 2            | 9.1 ± 3.5               | 36.9 ± 16.2 <sup>c</sup>  | 181.0 ± 63.0 <sup>e</sup>  | 265.3 ± 34.9 <sup>c</sup>  |
|                     | 2 × 3            | 6.0 ± 2.5               | 72.0 ± 39.1 <sup>a</sup>  | 314.1 ± 160.8 <sup>b</sup> | 307.4 ± 37.2 <sup>ab</sup> |
| B × C               | 1 × 1            | 17.1 ± 1.6              | 101.4 ± 35.0 <sup>a</sup> | 449.2 ± 159.2 <sup>b</sup> | 281.6 ± 24.3 <sup>b</sup>  |
|                     | 1 × 2            | 12.4 ± 0.6              | 56.9 ± 7.2 <sup>b</sup>   | 271.5 ± 36.8 <sup>c</sup>  | 317.4 ± 24.7 <sup>a</sup>  |
|                     | 1 × 3            | 9.2 ± 1.1               | 106.7 ± 4.1 <sup>a</sup>  | 481.9 ± 24.0 <sup>a</sup>  | 328.3 ± 15.4 <sup>a</sup>  |
|                     | 2 × 1            | 12.2 ± 0.9              | 35.8 ± 22.8 <sup>c</sup>  | 140.7 ± 50.0 <sup>d</sup>  | 277.3 ± 11.7 <sup>b</sup>  |
|                     | 2 × 2            | 6.4 ± 0.7               | 21.4 ± 1.3 <sup>d</sup>   | 105.5 ± 20.2 <sup>e</sup>  | 244.4 ± 13.0 <sup>c</sup>  |
|                     | 2 × 3            | 3.7 ± 0.3               | 35.7 ± 1.4 <sup>c</sup>   | 145.7 ± 24.1 <sup>d</sup>  | 287.0 ± 14.7 <sup>b</sup>  |

Table S1 continued

| Variables           |                  | ANTHO                     |
|---------------------|------------------|---------------------------|
| A<br>(viral status) | 1 (infected)     | 82.2 ± 16.0               |
|                     | 2 (negative)     | 86.1 ± 27.2               |
| B<br>(harvest year) | 1 (2019)         | 97.7 ± 23.0 <sup>a</sup>  |
|                     | 2 (2020)         | 74.6 ± 13.5 <sup>b</sup>  |
| C<br>(locality)     | 1 (Bedina Varoš) | 83.8 ± 15.8 <sup>b</sup>  |
|                     | 2 (Devići)       | 75.6 ± 20.2 <sup>b</sup>  |
|                     | 3 (Cerova)       | 100.1 ± 23.1 <sup>a</sup> |
| A × B               | 1 × 1            | 90.2 ± 18.3 <sup>b</sup>  |
|                     | 1 × 2            | 82.3 ± 13.2 <sup>b</sup>  |
|                     | 1 × 3            | 105.2 ± 25.8 <sup>a</sup> |
|                     | 1 × 4            | 66.9 ± 9.1 <sup>c</sup>   |
| A × C               | 1 × 1            | 78.0 ± 14.1 <sup>cd</sup> |
|                     | 1 × 2            | 84.4 ± 21.0 <sup>bc</sup> |
|                     | 1 × 3            | 96.3 ± 5.0 <sup>ab</sup>  |
|                     | 2 × 1            | 87.5 ± 17.2 <sup>bc</sup> |
|                     | 2 × 2            | 66.9 ± 10.7 <sup>d</sup>  |
|                     | 2 × 3            | 103.8 ± 33.5 <sup>a</sup> |
| B × C               | 1 × 1            | 85.8 ± 21.3 <sup>b</sup>  |
|                     | 1 × 2            | 91.1 ± 17.1 <sup>b</sup>  |
|                     | 1 × 3            | 116.2 ± 20.5 <sup>a</sup> |
|                     | 2 × 1            | 79.7 ± 8.5 <sup>b</sup>   |
|                     | 2 × 2            | 60.2 ± 5.8 <sup>c</sup>   |
|                     | 2 × 3            | 84.0 ± 11.4 <sup>b</sup>  |

Values with different letters in the columns that present influence of the main effects (A–viral status, B–harvest year and C–locality), respectively, as well as their interactions (A × B, A × C and B × C), respectively, denote statistically significant differences (Tukey's test,  $p < 0.05$ ) among raspberry fruits.
